# Supplementary material
Source: PubMed Central journal article supplement (PMC3419479)
Supplement: NIHMS367806-supplement-supplement_1.pdf [file NIHMS367806-supplement-supplement_1.pdf]

**Individual patient data subgroup meta-analysis of surgery for spontaneous  
supratentorial intracerebral haemorrhage**

Table S1. Table of potential data sources

| Author (date of publication)    | Years of data collection | No. of cases | Evacuation method                                            | Time window  | Outcome measure                                               | Outcome timepoint | Location of haematoma            | Other inclusion criteria                       |
|---------------------------------|--------------------------|--------------|--------------------------------------------------------------|--------------|---------------------------------------------------------------|-------------------|----------------------------------|------------------------------------------------|
| McKissock (1961) <sup>1</sup>   | 1959-60                  | 180          | craniotomy                                                   | >14 days     | Full work/<br>partial disability/<br>full disability/<br>dead | 6 months          | supratentorial                   |                                                |
| Auer (1989) <sup>2</sup>        | 1983-6                   | 100          | endoscopic evacuation                                        | 48 hrs       | Similar to Rankin                                             | 6 months          | supratentorial                   | Aged 30-80<br>Volume >10ml                     |
| Juvela (1989) <sup>3</sup>      | 1982-6                   | 52           | craniotomy                                                   | 48 hrs       | GOS                                                           | 6 months          | supratentorial                   | Aged <65                                       |
| Batjer (1990) <sup>4</sup>      | 1987-9                   | 21           | craniotomy                                                   | 24 hrs       | similar to GOS                                                | 6 months          | putaminal                        | Aged 30-75<br>Diameter > 3cm                   |
| Chen (1992) <sup>5</sup>        | 1986-90                  | 127          | craniectomy/<br>stereotaxy/<br>ventricular drainage          | Not recorded | 5 Category<br>dead/worse/<br>moderate/<br>fair/good           | 3 to 39 months    | supratentorial<br>cerebellar     | Not recorded                                   |
| Morgenstern (1998) <sup>6</sup> | 1993-6                   | 34           | craniotomy                                                   | 12 hrs       | Barthel (Rankin)                                              | 6 months          | supratentorial                   | GCS 5-15<br>Volume >9ml                        |
| Zuccarello (1999) <sup>7</sup>  | 1994-6                   | 20           | craniotomy/<br>stereotaxy                                    | 24 hrs       | GOS                                                           | 3 months          | supratentorial                   | Volume >10ml<br>GCS >4                         |
| Chen (2001) <sup>8</sup>        | 1998 -<br>2000           | 500          | craniotomy/<br>burrhole (+/-<br>streptokinase<br>/urokinase) | 72 hrs       | based on Barthel                                              | 3-6 months        | supratentorial<br>infratentorial | Aged <70<br>GCS >6<br>Volume >10ml             |
| Hossieni (2003) <sup>9</sup>    | Not recorded             | 37           | stereotactic aspiration                                      | 24 hrs       | Karnofsky                                                     | 12 months         | "Deep"                           | Aged >30<br>Volume > 40ml                      |
| Teernstra (2003) <sup>10</sup>  | 1996-9                   | 71           | stereotactic aspiration +<br>urokinase                       | 72 hrs       | Rankin                                                        | 6 months          | supratentorial                   | Aged >45 years<br>Volume > 10ml                |
| Hattori (2004) <sup>11</sup>    | 1998-<br>2000            | 242          | stereotactic evacuation                                      | 24 hrs       | Rankin                                                        | 12 months         | putaminal                        | Aged 35-85<br>Japanese Coop<br>Study grade 2-3 |
| Mendelow (2005) <sup>12</sup>   | 1995-<br>2004            | 1033         | craniotomy/<br>other                                         | 96 hrs       | GOS<br>Rankin                                                 | 6 months          | supratentorial                   | GCS>4<br>Diameter > 2cm                        |
| Pantazis (2006) <sup>13</sup>   | 1998 -<br>2003           | 108          | craniotomy                                                   | 8 hrs        | GOS                                                           | 12 months         | supratentorial                   | Volume > 30 ml<br>Aged <80<br>GCS <15          |
| Wang (2009) <sup>14</sup>       | 2003-4                   | 377          | minimally<br>invasive +<br>urokinase                         | 72 hrs       | Rankin                                                        | 3 months          | basal ganglia                    | Aged 40-75<br>GCS >8<br>Volume 25-<br>40ml     |

## References

1. McKissock W, Richardson A, Taylor J. Primary intracerebral haemorrhage: a controlled trial of surgical and conservative treatment in 180 unselected cases. *Lancet*. 1961;2:221-6.

2. Auer LM, Deinsberger W, Niederkorn K, Gell G, Kleinert R, Schneider G, et al. Endoscopic surgery versus medical treatment for spontaneous intracerebral hematoma: a randomized study. *Journal of Neurosurgery*. 1989;70:530-5.
3. Juvela S, Heiskanen O, Poranen A, Valtonen S, Kuurne T, Kaste M, et al. The treatment of spontaneous intracerebral hemorrhage. A prospective randomised trial of surgical and conservative treatment. *J Neurosurg*. 1989;70:755 - 8.
4. Batjer H, Reisch J, Allen B, Plaizier L, Jen Su C. Failure of surgery to improve outcome in hypertensive putaminal hemorrhage. A prospective randomised trial. *Arch Neurol*. 1990;47:1103 - 6.
5. Chen X, Yang H, Cheng Z. A prospective randomised trial of surgical and conservative treatment of hypertensive intracerebral haemorrhage. *Acta Acad Shanghai Med*. 1992;19:237 - 40.
6. Morgenstern LB, Frankowski RF, Shedden P, Pasteur W, Grotta JC. Surgical treatment for intracerebral hemorrhage (STICH): a single-center, randomized clinical trial. *Neurology*. 1998;51:1359-63.
7. Zuccarello M, Brott T, Derex L, Kothari R, Sauerbeck L, Tew J, et al. Early surgical treatment for intracerebral hemorrhage. A randomized feasibility study. *Stroke*. 1999;30:1833 - 9.
8. Teernstra OPM, Evers SMAA, Lodder J, Leffers P, Franke CL, Blaauw G. Stereotactic treatment of intracerebral hematoma by means of a plasminogen activator: a multicenter randomized controlled trial (SICHPA). *Stroke*. 2003;34:968-74.
9. Hosseini H, Leguerinel C, Hariz M, Melon E, Palfi S, Deck P, et al. Stereotactic aspiration of deep intracerebral hematomas under computed tomographic control: a multicentric prospective randomised trial. *Cerebrovascular Diseases*. 2003;16S:57.
10. Pantazis G, Tsitsopoulos P, Mihas C, Katsiva V, Stavrianos V, Zymaris S, et al. Early surgical treatment vs conservative management for spontaneous supratentorial intracerebral hematomas: A prospective randomized study. *Surgical Neurology*. 2006;66:492-501.
11. Chen X, Wu J, Zhou X, YZhang Y, Wang Z, Qin Z, et al. The randomized multicentric prospective controlled trial in the standardized treatment of hypertensive intracerebral hematomas: The comparison of surgical therapeutic outcomes with conservative therapy. *Chinese Journal of clinical Neuroscience*. 2001;4:365-8.
12. Hattori N, Katayama Y, Maya Y, Gatherer A. Impact of stereotactic hematoma evacuation on activities of daily living during the chronic period following spontaneous putaminal hemorrhage: a randomised study. *Journal of Neurosurgery*. 2004;101:417-20.
13. Mendelow AD, Gregson BA, Fernandes HM, Murray GD, Teasdale GM, Hope DT, et al. Early surgery versus initial conservative treatment in patients with spontaneous supratentorial intracerebral haematomas in the International Surgical Trial in Intracerebral Haemorrhage (STICH): a randomised trial. *Lancet*. 2005; 365:387-97.
14. Wang WZ, Jiang B, Liu HM, Li D, Lu CZ, Zhao YD, et al. Minimally invasive craniopuncture therapy vs. conservative treatment for spontaneous intracerebral hemorrhage: results from a randomized clinical trial in China. *Int J Stroke*. 2009;4:11-6.

Figure S1. Meta-analysis of published data for all 14 trials: Mortality

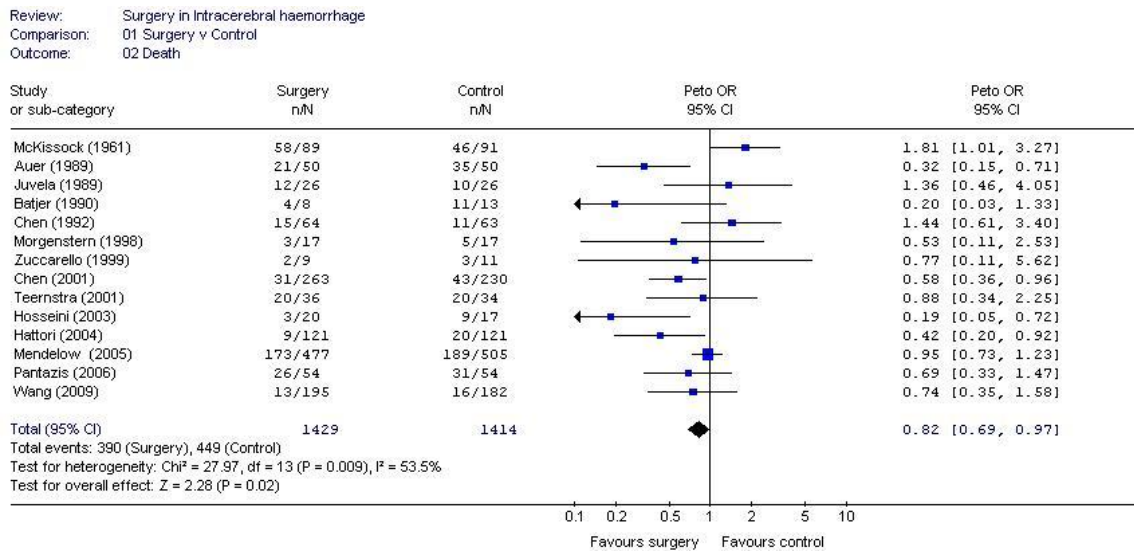

Reference: Updated from: Mendelow A. Surgical management of intracerebral hemorrhage. In: Carhuapoma J, Mayer S, Hanley D, editors. Intracerebral Hemorrhage. Cambridge: Cambridge University Press; 2009. p. 165-75.

Figure S2. Meta-analysis of published data for death and disability

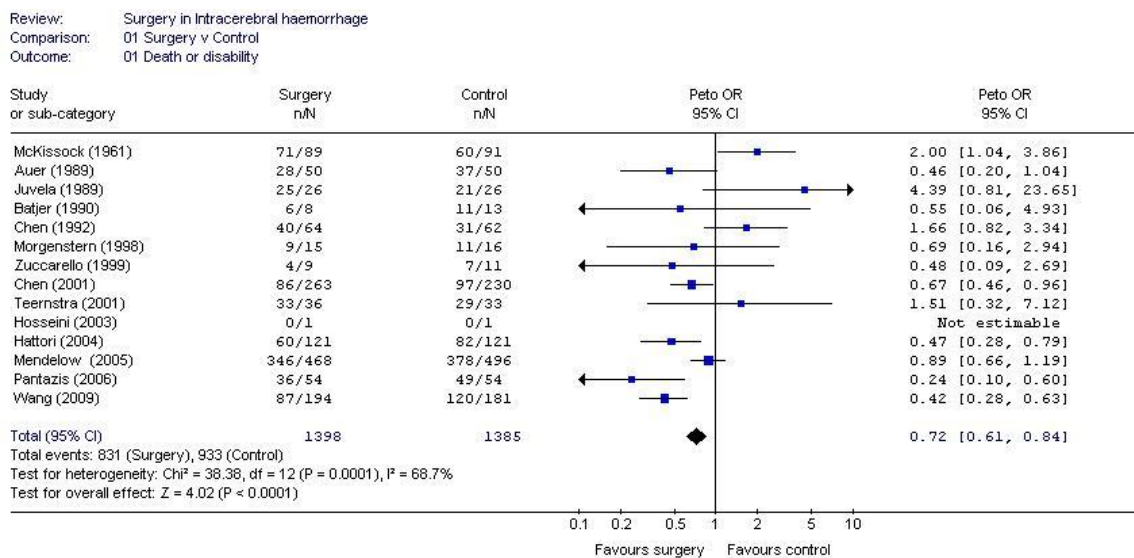

Reprinted from: Mendelow A, Gregson B. Surgery for Intracerebral Hemorrhage. In: Mohr JP, Wolf P, Grotta J, Moskowitz M, Mayberg M, von Kummer R, editors. Stroke: Pathophysiology, Diagnosis and Management. 5th ed: Saunders; 2011.
